# Supplementary material for: Energy‐Stress‐Mediated AMPK Activation Promotes GPX4‐Dependent Ferroptosis through the JAK2/STAT3/P53 Axis in Renal Cancer
Source: Hindawi journal article supplement (doi:10.1155/2022/2353115), 2022-01-01

**A**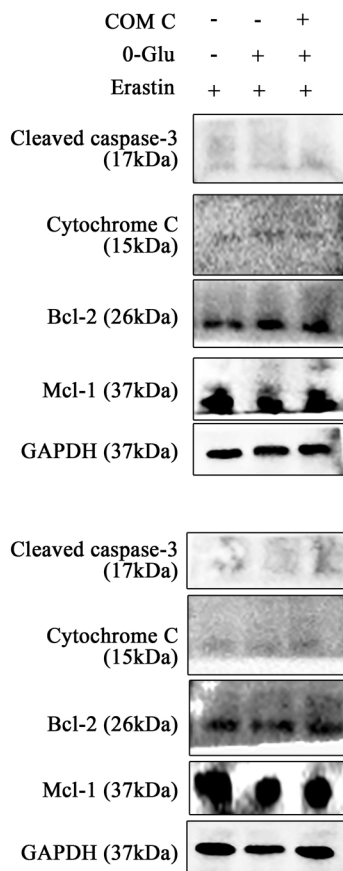**B**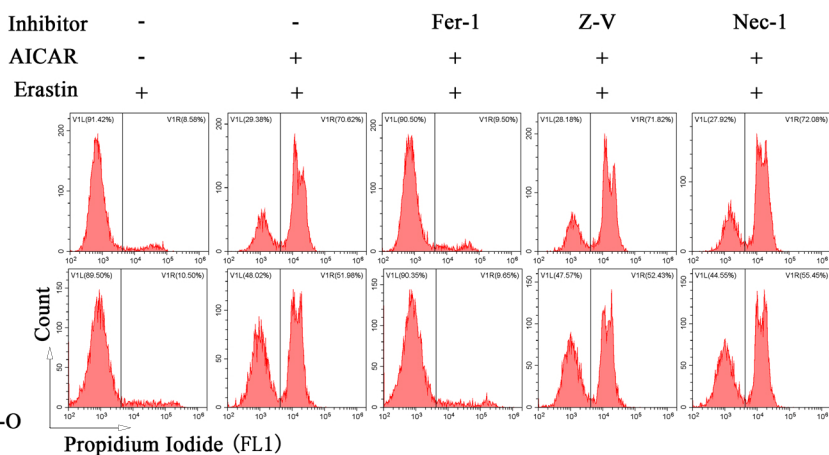**C**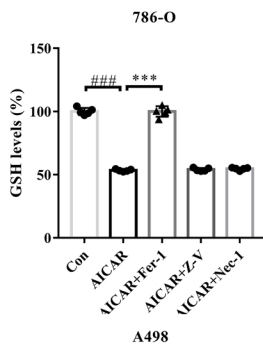**D**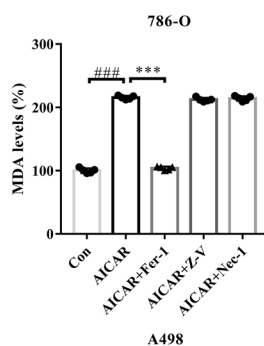**E**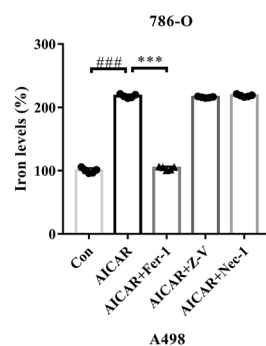**A498**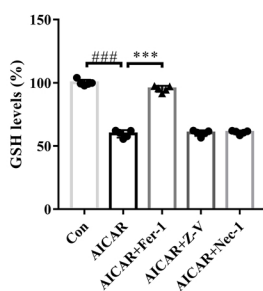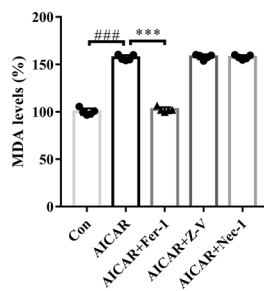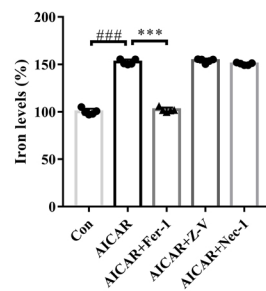**F**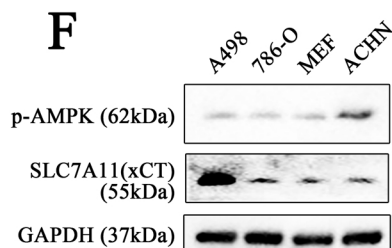**G**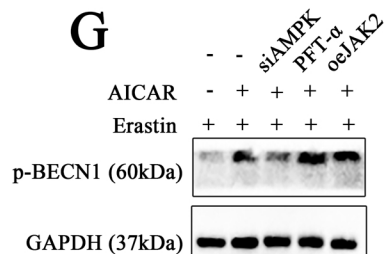

Supplement: f1 [file 2353115.f1.pdf]
