# Supplementary material for: Energy‐Stress‐Mediated AMPK Activation Promotes GPX4‐Dependent Ferroptosis through the JAK2/STAT3/P53 Axis in Renal Cancer
Source: Hindawi journal article supplement (doi:10.1155/2022/2353115), 2022-01-01
Supplement: f2 [file 2353115.f2.pdf]

**A**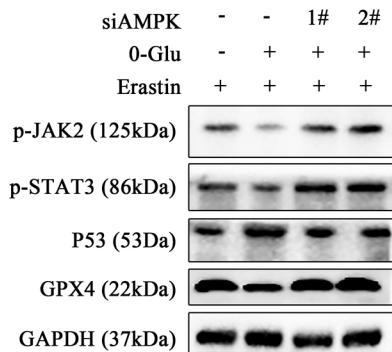**B**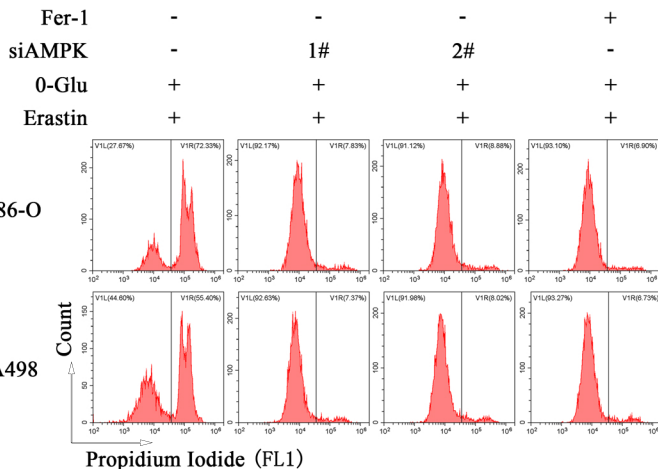**C**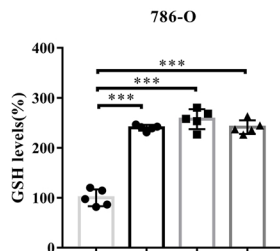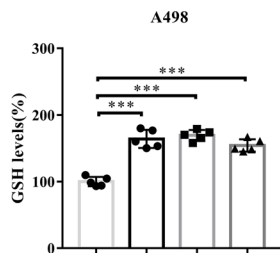**D**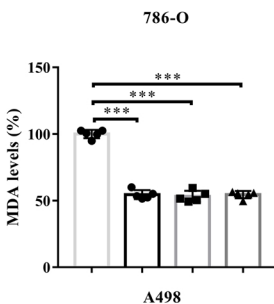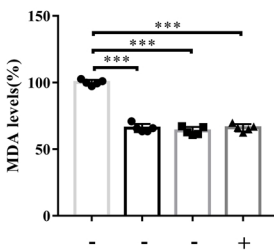**E**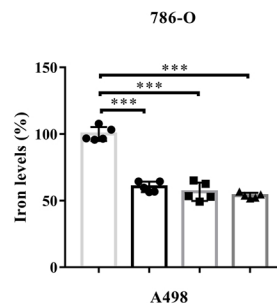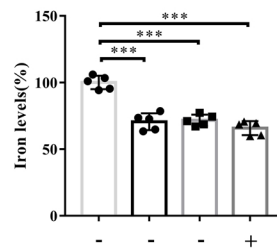

|         |   |    |    |   |
|---------|---|----|----|---|
| Fer-1   | - | -  | -  | + |
| siAMPK  | - | 1# | 2# | - |
| 0-Glu   | + | +  | +  | + |
| Erastin | + | +  | +  | + |

|   |    |    |   |
|---|----|----|---|
| - | -  | -  | + |
| - | 1# | 2# | - |
| + | +  | +  | + |
| + | +  | +  | + |

|   |    |    |   |
|---|----|----|---|
| - | -  | -  | + |
| - | 1# | 2# | - |
| + | +  | +  | + |
| + | +  | +  | + |
